# Supplementary material for: Effects of Vitamin D Supplementation on IGF-1 and Calcitriol: A Randomized-Controlled Trial
Source: MDPI journal article supplement (doi:10.3390/nu9060623), 2017-06-17
Supplement: s1 [file s1]

**Table S1.** Baseline characteristics of participants after partition in quartiles according to 25-hydroxyvitamin D concentrations.

|                                   | 25-hydroxyvitamin D quartiles              |                                                |                                                |                                            | <i>p</i> -value for trend |
|-----------------------------------|--------------------------------------------|------------------------------------------------|------------------------------------------------|--------------------------------------------|---------------------------|
|                                   | Quartile 1<br>≤17.2 ng/mL ( <i>n</i> = 44) | Quartile 2<br>17.3-21.9 ng/mL ( <i>n</i> = 44) | Quartile 3<br>22.0-25.7 ng/mL ( <i>n</i> = 46) | Quartile 4<br>≥25.8 ng/mL ( <i>n</i> = 41) |                           |
| Age [years]                       | 61 ± 11                                    | 59 ± 10                                        | 60 ± 12                                        | 61 ± 12                                    | 0.85                      |
| Females [%]                       | 43                                         | 50                                             | 57                                             | 44                                         | 0.76                      |
| BMI [kg/m <sup>2</sup> ]          | 30.2 ± 5.3                                 | 30.8 ± 6.0                                     | 30.1 ± 4.9                                     | 29.7 ± 4.2                                 | 0.51                      |
| Office systolic BP (mmHg)         | 145 ± 16                                   | 142 ± 13                                       | 142 ± 16                                       | 143 ± 16                                   | 0.56                      |
| Office diastolic BP (mmHg)        | 86 ± 10                                    | 89 ± 11                                        | 88 ± 10                                        | 85 ± 10                                    | 0.73                      |
| IGF-1 [ng/mL]                     | 120.7 ± 52.4                               | 120.2 ± 41.2                                   | 115.7 ± 38.9                                   | 115.4 ± 34.5                               | 0.48                      |
| 1,25(OH) <sub>2</sub> D [pg/mL]   | 45.3 ± 18.4                                | 49.9 ± 19.2                                    | 56.1 ± 20.8                                    | 50.7 ± 16.0                                | 0.09                      |
| PTH [pg/mL]*                      | 54.3 (40.3-65.1)                           | 52.8 (36.3-64.1)                               | 47.8 (39.8-66.6)                               | 45.9 (39.2-55.0)                           | 0.19                      |
| Serum calcium [mmol/L]            | 2.26 ± 0.08                                | 2.26 ± 0.10                                    | 2.26 ± 0.11                                    | 2.29 ± 0.11                                | 0.19                      |
| Serum phosphate [mmol/L]          | 0.94 ± 0.16                                | 0.96 ± 0.17                                    | 0.94 ± 0.16                                    | 0.96 ± 0.16                                | 0.77                      |
| Diabetes mellitus [%]             | 57                                         | 25                                             | 30                                             | 29                                         | 0.02                      |
| Fasting glucose [mg/dL]*          | 116 (91-158)                               | 96 (93-174)                                    | 99 (90-117)                                    | 100 (93-127)                               | 0.10                      |
| HbA1c [mmol/mol]*                 | 47 (38-59)                                 | 39 (37-42)                                     | 40 (36-45)                                     | 40 (36-47)                                 | 0.01                      |
| HOMA-IR*                          | 2.54 (1.29-5.68)                           | 1.78 (1.15-3.89)                               | 1.56 (1.08-2.57)                               | 2.27 (1.18-4.50)                           | 0.24                      |
| eGFR [mL/min/1.73m <sup>2</sup> ] | 80.2 ± 19.8                                | 79.1 ± 16.7                                    | 76.8 ± 16.2                                    | 79.6 ± 20.7                                | 0.74                      |
| Triglycerides [mg/dL]*            | 117 (75-185)                               | 120 (86-163)                                   | 117 (69-153)                                   | 124 (75-163)                               | 0.85                      |
| HDL-cholesterol [mg/dL]           | 56 ± 14                                    | 56 ± 15                                        | 58 ± 16                                        | 56 ± 21                                    | 0.76                      |
| LDL-cholesterol [mg/dL]           | 109 ± 45                                   | 121 ± 41                                       | 116 ± 36                                       | 107 ± 42                                   | 0.71                      |
| CRP [mg/L] *                      | 1.6 (0.9-3.0)                              | 1.5 (0.8-3.3)                                  | 1.7 (0.9-4.1)                                  | 2.0 (1.2-3.6)                              | 0.31                      |

Data are shown as means with standard deviation, median and interquartile range, or as percentages, whichever was appropriate. P-values for trends were calculated by ANOVA or chi-square test, whichever was appropriate. \*Skewed variables for which logarithmic transformed values were used in ANOVA but untransformed values are shown in the Table. BMI = body-mass index, BP = blood pressure, IGF-1 = insulin-like growth factor-1, 1,25(OH)<sub>2</sub>D = 1,25-dihydroxyvitamin D, PTH = parathyroid hormone, HbA1c = hemoglobin A1c; HOMA-IR = homeostasis model assessment-insulin resistance, eGFR = estimated glomerular filtration rate, HDL-cholesterol = high-density lipoprotein-cholesterol, LDL-cholesterol = low-density lipoprotein-cholesterol, CRP = C-reactive protein.

**Table S2.** IGF-1 and 1,25(OH)<sub>2</sub>D at baseline and follow-up in subgroups with 25(OH)D concentrations below 20 and 16 ng/mL at baseline.

|                            |                                    | Baseline     | Follow-Up           | Treatment Effect    | <i>p</i> -value |
|----------------------------|------------------------------------|--------------|---------------------|---------------------|-----------------|
| IGF-1                      | 25(OH)D <20 ng/mL ( <i>n</i> = 70) |              |                     |                     |                 |
|                            | Vitamin D ( <i>n</i> = 29)         | 114.8 ± 49.2 | 117.4 ± 37.4        | 3.6 (-13.2 to 20.5) | 0.67            |
|                            | Placebo ( <i>n</i> = 41)           | 124.9 ± 52.8 | 120.9 ± 57.4        |                     |                 |
|                            | 25(OH)D <16 ng/mL ( <i>n</i> = 39) |              |                     |                     |                 |
| Vitamin D ( <i>n</i> = 14) | 109.3 ± 56.7                       | 112.5 ± 32.2 | 9.1 (-16.6 to 34.7) | 0.48                |                 |
| Placebo ( <i>n</i> = 25)   | 123.3 ± 46.7                       | 112.1 ± 55.0 |                     |                     |                 |
| 1,25(OH) <sub>2</sub> D    | 25(OH)D <20 ng/mL ( <i>n</i> = 67) |              |                     |                     |                 |
|                            | Vitamin D ( <i>n</i> = 29)         | 49.2 ± 16.1  | 59.3 ± 23.2         | 10.0 (1.8 to 18.2)  | 0.02            |
|                            | Placebo ( <i>n</i> = 38)           | 44.1 ± 19.7  | 45.5 ± 16.6         |                     |                 |
|                            | 25(OH)D <16 ng/mL ( <i>n</i> = 37) |              |                     |                     |                 |
| Vitamin D ( <i>n</i> = 14) | 50.9 ± 15.9                        | 68.1 ± 27.0  | 14.8 (2.0 to 27.7)  | 0.03                |                 |
| Placebo ( <i>n</i> = 23)   | 41.0 ± 17.8                        | 44.3 ± 17.2  |                     |                     |                 |

Data are shown as means with standard deviation. Treatment effects with 95% confidence interval and *p*-values were calculated by ANCOVA for group differences at follow-up with adjustment for baseline values. IGF-1 = insulin-like growth factor-1, 1,25(OH)<sub>2</sub>D = 1,25-dihydroxyvitamin D, 25(OH)D = 25-hydroxyvitamin D.
